# Supplementary material for: Prognostic relevance of elevated pulmonary arterial pressure assessed non-invasively: Analysis in a large patient cohort with invasive measurements in near temporal proximity
Source: PLOS journal article supplement (doi:10.1371/journal.pone.0191206), 2018-01-19

**S1 Fig. Kaplan-Meier curves for survival of patients with or without PH, differentiated by sex (a: male, b: female).** Abbreviations: PH pulmonary hypertension, HR hazard ratio, 95%CI 95% confidence interval

**A**

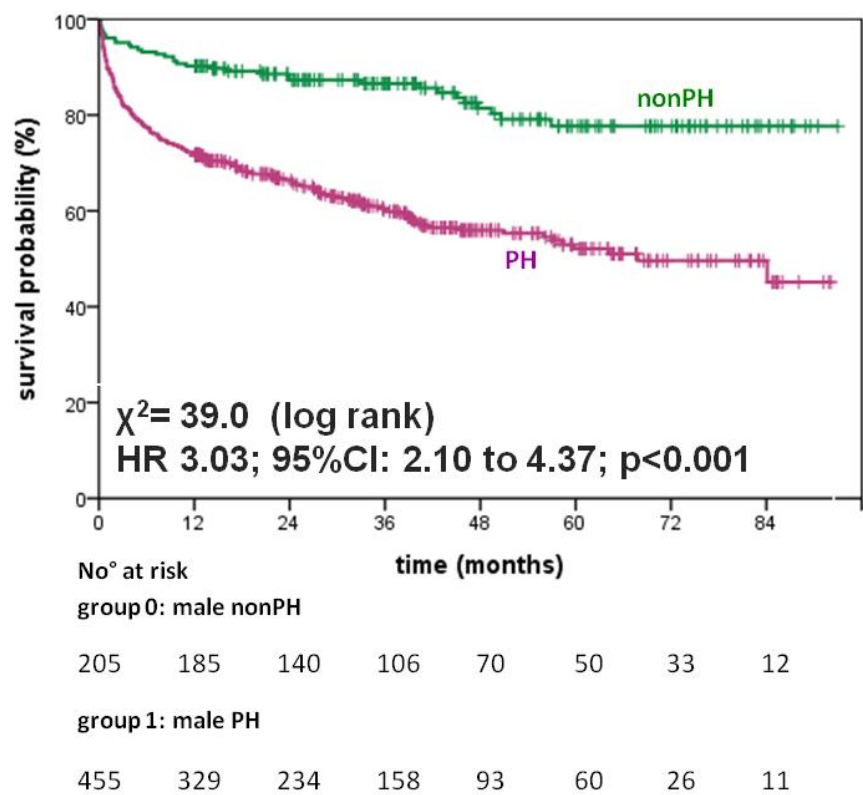

**B**

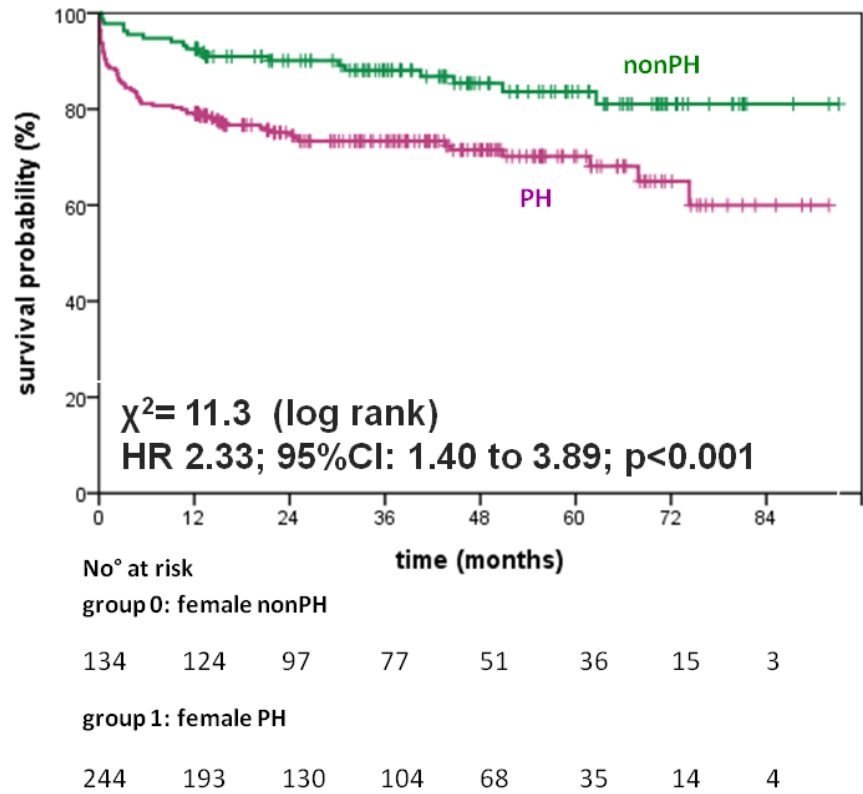

Supplement: S1 (10.1371/journal.pone.0191206.s001) [file journal.pone.0191206.s001]
