# Supplementary material for: Prognostic relevance of elevated pulmonary arterial pressure assessed non-invasively: Analysis in a large patient cohort with invasive measurements in near temporal proximity
Source: PLOS journal article supplement (doi:10.1371/journal.pone.0191206), 2018-01-19

**S7 Fig. Kaplan-Meier curves for survival according to left ventricular function by CI (a) and LV-EF (b).** Optimal cut-off for dichotomous analysis was determined by ROC analyses. Abbreviations: CI cardiac index, LV-EF left ventricular ejection fraction, HR hazard ratio, 95%CI 95% confidence interval, ROC receiver-operator characteristics

A

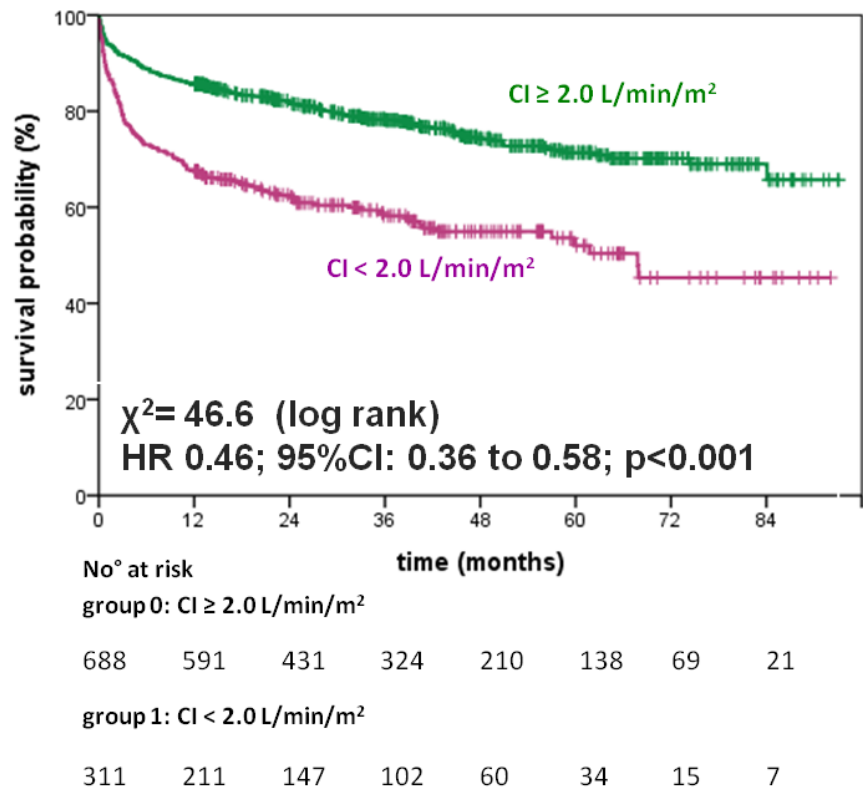

B

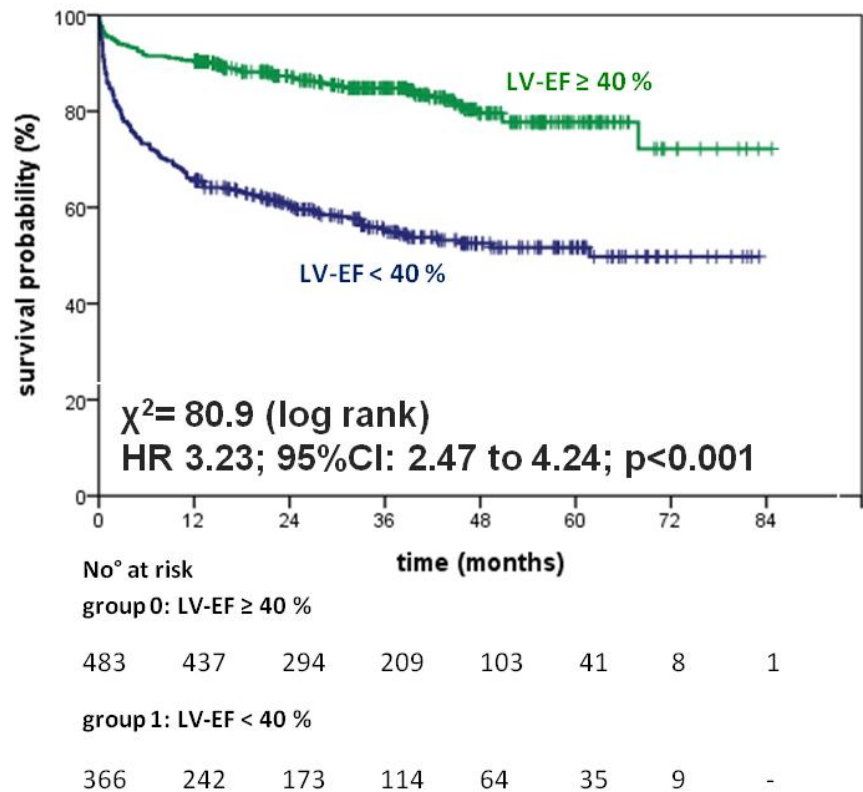

Supplement: S7 (10.1371/journal.pone.0191206.s007) [file journal.pone.0191206.s007]
