# Supplementary material for: Prognostic relevance of elevated pulmonary arterial pressure assessed non-invasively: Analysis in a large patient cohort with invasive measurements in near temporal proximity
Source: PLOS journal article supplement (doi:10.1371/journal.pone.0191206), 2018-01-19

**S8 Fig. Kaplan-Meier curves for survival in dependence of diastolic function by RAP measured invasively (a) or non-invasive (b), and invasively measured LVEDP (c). Optimal cut-off for dichotomous analysis was determined by ROC analyses. Abbreviations: RAP right atrial pressure, LVEDP LV end-diastolic pressure, HR hazard ratio, 95%CI 95% confidence interval, ROC receiver-operator characteristics**

**A**

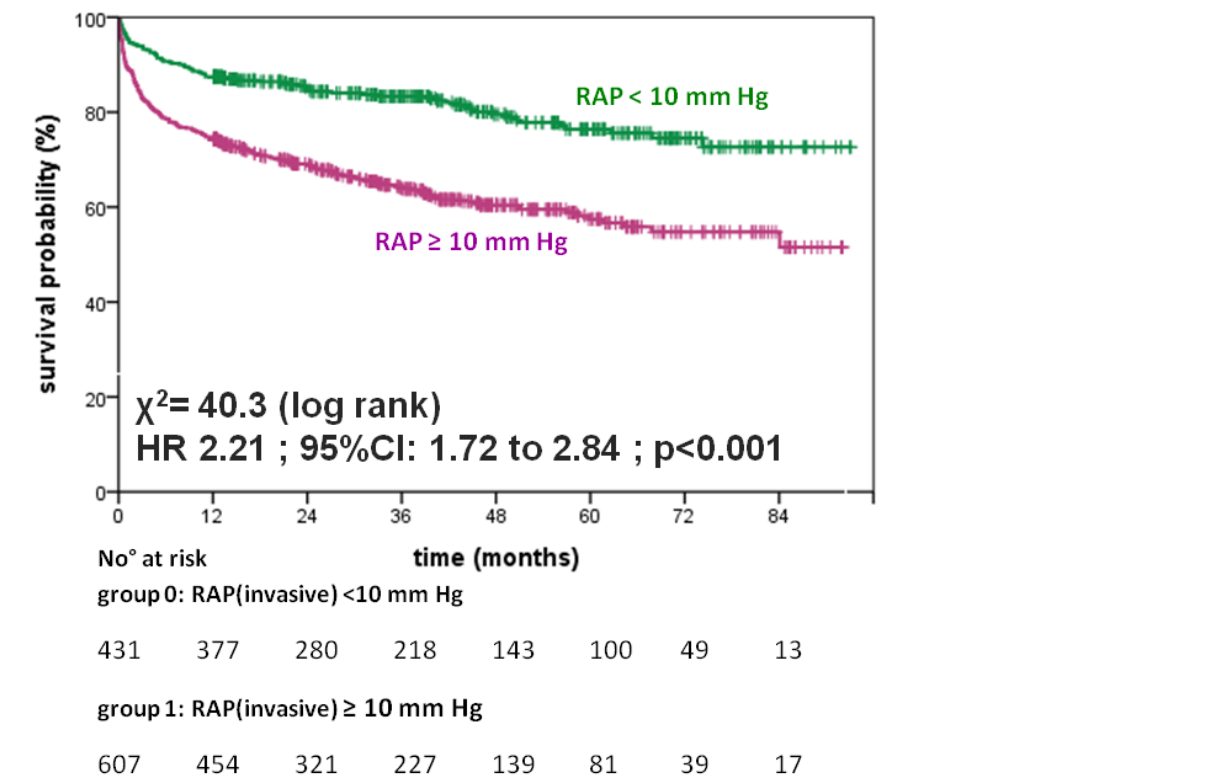

**B**

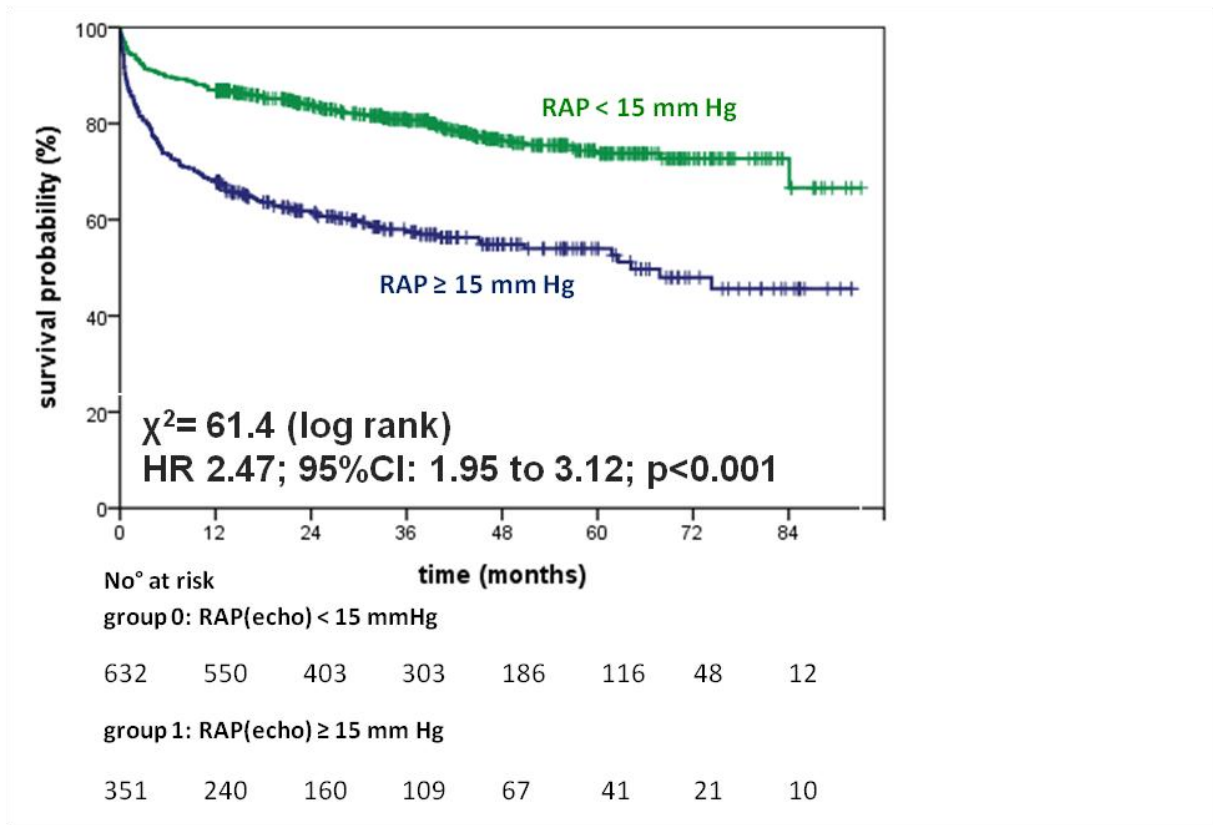

C

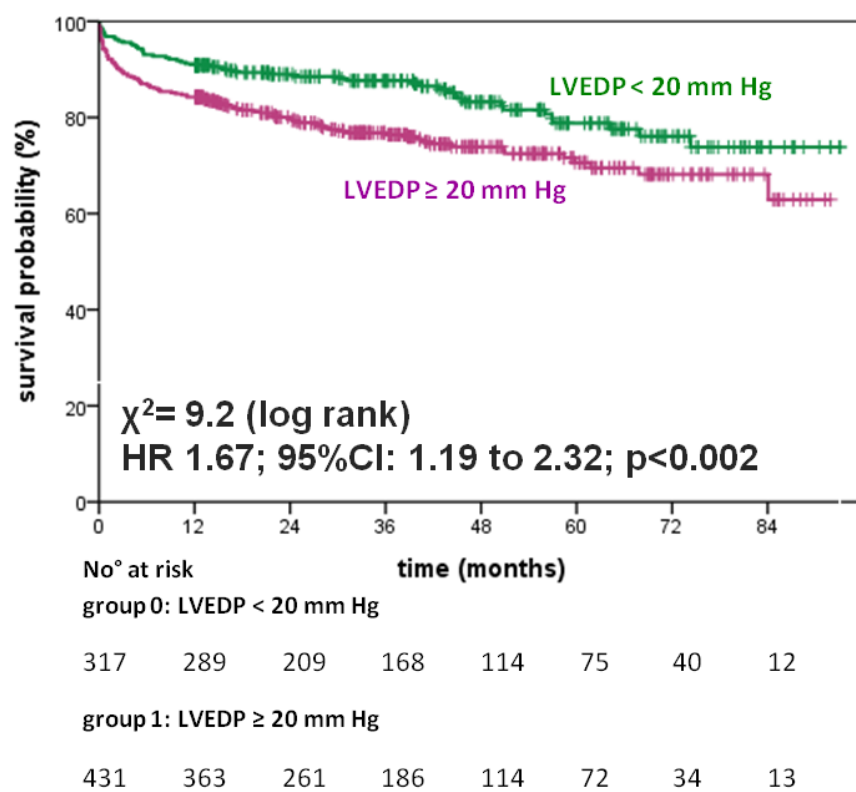

Supplement: S8 (10.1371/journal.pone.0191206.s008) [file journal.pone.0191206.s008]
